# Supplementary material
Source: Research Square preprint supplement (doi:10.21203/rs.3.rs-9418335/v1)
Supplement: Supplementary file 1 [file def83b1dd2d3eb42cfe83778.docx]

Appendix

Appendix A- Search strategies

Risk of bias tool modification search (25/5/24)

EMBASE

8 limit 7 to (english language and yr="2014 -Current")

7 (1 or 2 or 5) and 6

6 (tool* or reviews).ti. or tools.mp. or (("rob 2" or "rob2") and (ROBINS or ROBINSI)).mp. or ("rob 2" or "rob2" or "risk of bias 2" or ROBINS or ROBINSI or cochrane).ti. or *methodology/

5 "risk of bias".kf. and (3 or 4)

4 "risk of bias".ab. and rob.ab. /freq=3

3 bias.ti. or "risk of bias".ab. /freq=3

2 (bias adj3 risk*).ti.

1 (bias adj3 (analy* or assess*)).ti. and (bias adj3 risk*).mp.

Rapid Review Search (15/7/24)


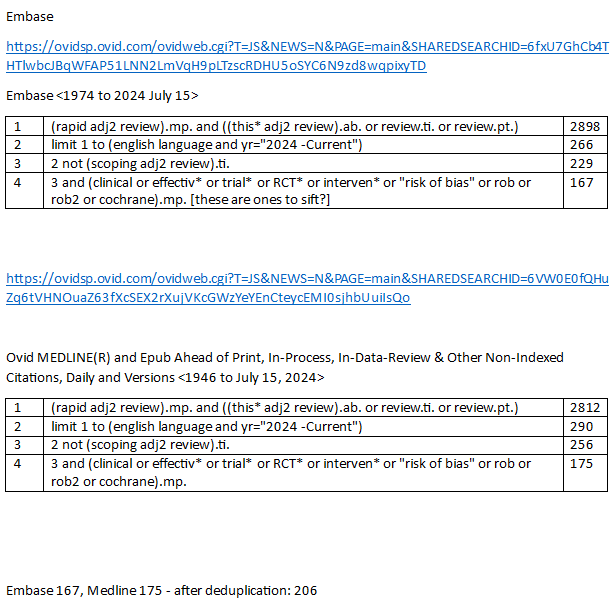


Rapid Review of Reviews Search 16/12/24


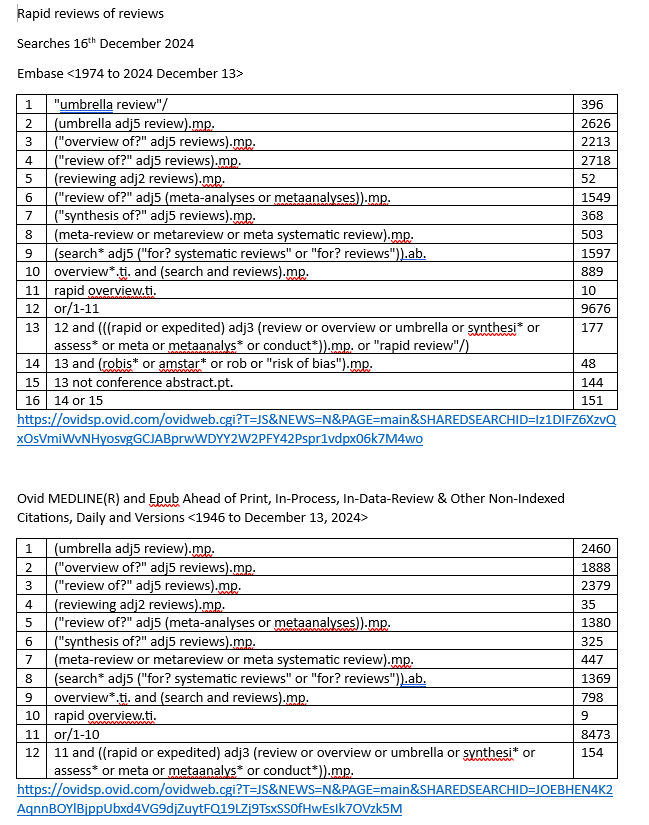


Appendix B- Exclusion Reasons

**Rapid Reviews**

Table 1. Exclusion reasons from the rapid review search

| **Exclusion reasons** | **Number of studies (n=156)** |
| --- | --- |
| No RoB | 52 |
| Doesn't include at least 1 RCT | 36 |
| Not intervention based | 31 |
| COVID-19 | 22 |
| Other | 11 |
| Scoping Review | 2 |
| No systematic search | 2 |

**Rapid Reviews of Reviews**

Table 1. Exclusion reasons from the review of rapid reviews search

| **Exclusion reasons** | **Number of studies (n=119)** |
| --- | --- |
| Other (not intervention based etc.) | 36 |
| Reviews that don’t include RoB/quality appraisal | 23 |
| Not a review of reviews | 22 |
| COVID-19 | 16 |
| Not rapid | 12 |
| Conference abstracts | 5 |
| Duplicate | 5 |
